# Supplementary material
Source: HighWire-hosted journal article supplement (https://bmjopen.bmj.com/content/14/2/e074552)
Supplement: inline-supplementary-material-1 [file inline-supplementary-material-1.pdf]

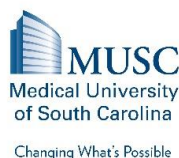

**Institutional Review Board for Human Research (IRB)  
Office of Research Integrity (ORI)  
Medical University of South Carolina**

**Palmetto Place Office Park  
1 South Park Circle, Bldg. 1, Suite 401  
Charleston, SC. 29407  
Federal Wide Assurance # 1888**

**APPROVAL:**

This is to certify that the research proposal **Pro00106021** entitled Fit Families Obesity Intervention

Submitted by: **Phillippe Cunningham MD**  
Department: **Glocal and Community Health**

This is to certify that the study entitled, Fit Families Obesity Intervention, has been reviewed by MUSC **IRB-I** and approved with respect to the study of human subjects as adequately protecting the rights and welfare of the individuals involved, employing adequate methods of securing informed consent from these individuals and not involving undue risk in the light of potential benefits to be derived therefrom. The Fit Families Obesity Intervention study is sponsored by NIH. Dr. Phillippe Cunningham is the Lead Principal Investigator (PI) of the overall study.

No IRB member who has a conflicting interest was involved in the review or approval of this study, except to provide information as requested by the IRB.

Type: **Full IRB Review**

**Vice- Chair, IRB-I - Medical University of South Carolina  
Susan Newman, PhD, RN, CCRN\***

**\* *Electronic Signature:*** This document has been electronically signed by the IRB Chairman through the HSSC eIRB Submission System authorizing IRB approval for this study as described in this letter.

Continuing Review – Full Board or Expedited Research
